# Supplementary material for: Evaluating the Efficacy of Common Treatments Used for Vairimorpha (Nosema) spp. Control
Source: MDPI journal article supplement (doi:10.3390/app13031303), 2023-01-18
Supplement: s1 [file s1]

Archive with 1 entries (1 files):
- applsci-2102261-supplementary.pdf
